# Supplementary material
Source: PubMed Central journal article supplement (PMC3001409)
Supplement: supp_124_1_91__1.pdf [file supp_124_1_91__1.pdf]

A

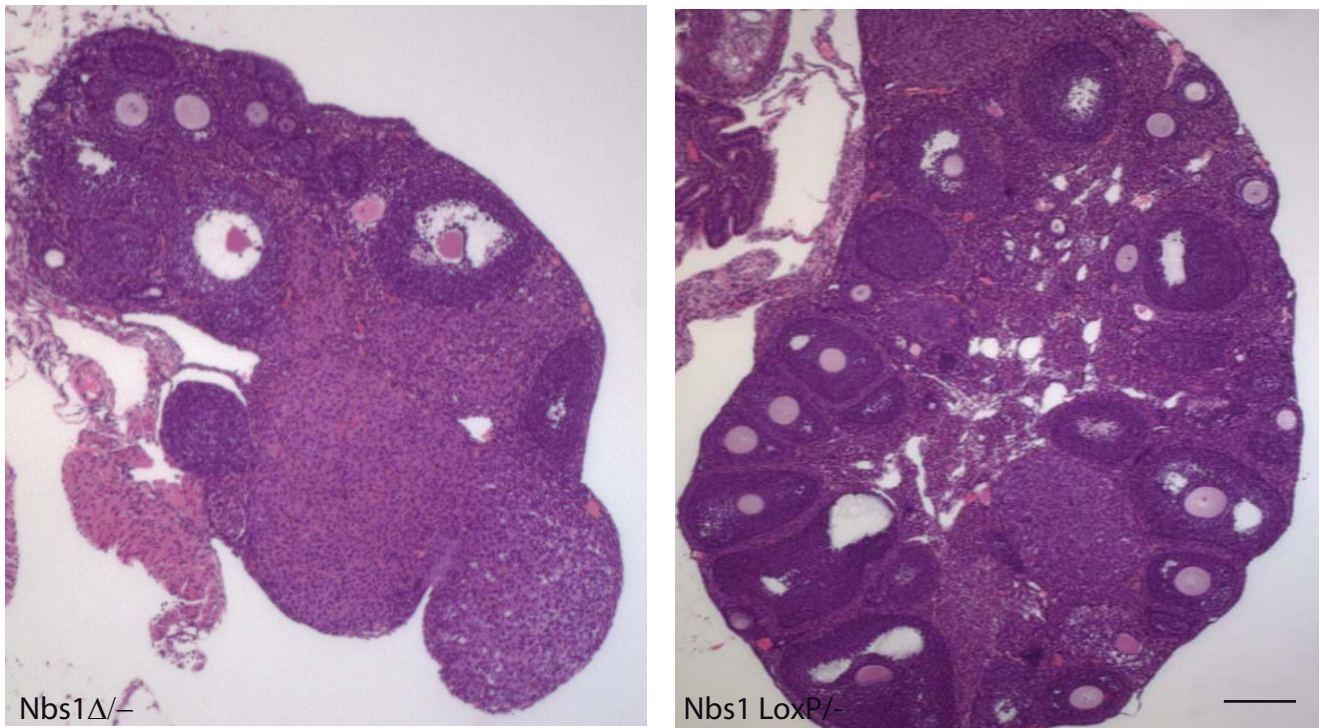

B

|                                       | Nbs1 $\Delta$ / $-$ ♀<br>X<br>WT ♂ <sup>1255</sup> | Nbs1 $\Delta$ / $-$ ♀<br>X<br>WT ♂ <sup>1273</sup> |
|---------------------------------------|----------------------------------------------------|----------------------------------------------------|
| Total pups                            | 58                                                 | 44                                                 |
| Nbs1 Deleted pups                     | 31                                                 | 22                                                 |
| Nbs1 Undeleted pups<br>/loxP positive | 4                                                  | 2                                                  |

Supplementary Fig. S1 A) Hematoxylin and eosin stained sections from 5 weeks old *Nbs1* $\Delta$ / $-$  and *Nbs1*<sup>loxP</sup>/ $-$  females. Scale bar 100  $\mu$ m. B) Progeny data arising from two *Nbs1* $\Delta$ / $-$  females (indicated by numbers). Primer pairs used for genotyping are the same indicated in figure 3.
