# Supplementary material
Source: PubMed Central journal article supplement (PMC3001409)
Supplement: supp_124_1_91__2.pdf [file supp_124_1_91__2.pdf]

A

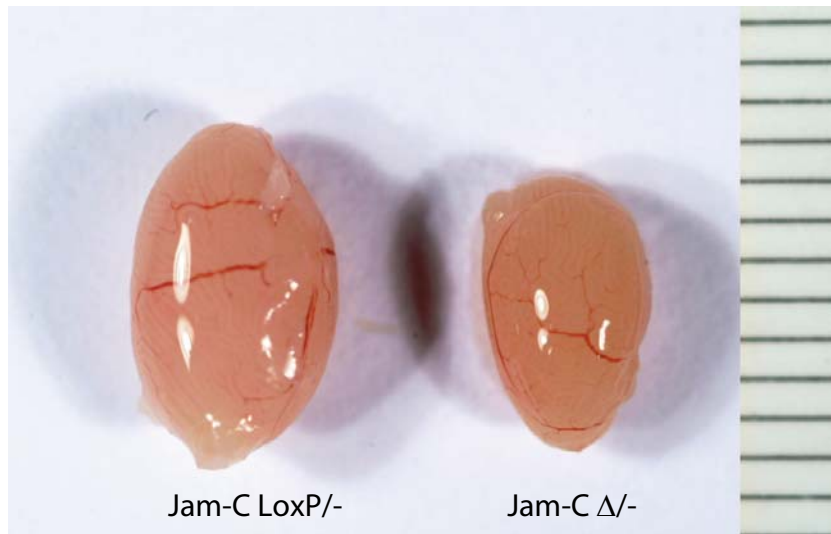

B

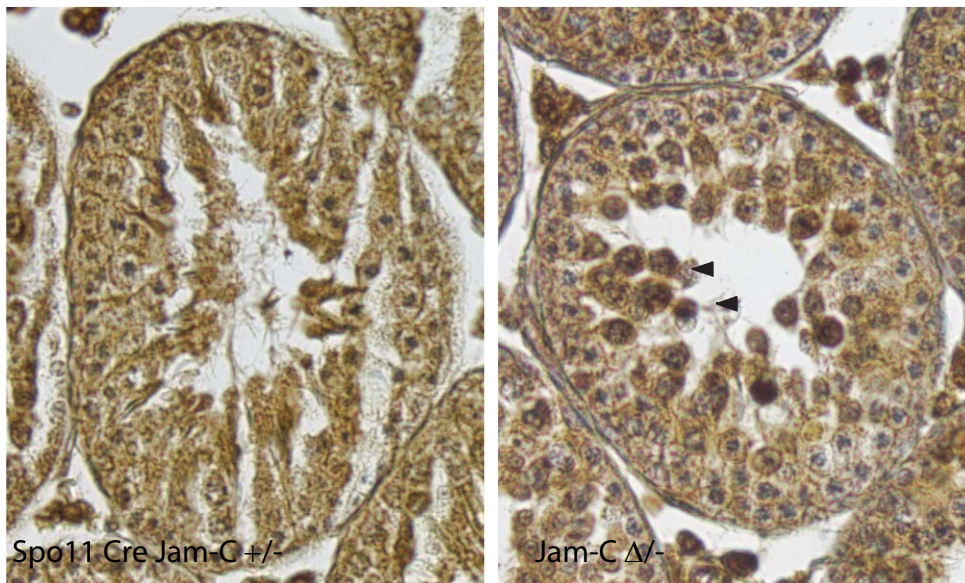

Supplementary Fig. S2 A) Photographs of testes of *Jam-C<sup>LoxP/-</sup>* and *Jam-C<sup>Δ/-</sup>* mice. B) Evaluation of apoptosis on histological testes sections of *Spo11<sup>Cre</sup> Jam-C<sup>+/-</sup>* and *Jam-C<sup>Δ/-</sup>* adult mice performed with TUNEL assay. Representative apoptotic cells are indicated by arrowheads. Nuclei were counterstained with hematoxylin.
