# Supplementary material
Source: PubMed Central journal article supplement (PMC3001409)
Supplement: supp_124_1_91__3.pdf [file supp_124_1_91__3.pdf]

**Table S1. Sequences of primers used for genotyping and semiquantitative PCRs.**

| Primer Name          | Sequence 5'-3'                      |
|----------------------|-------------------------------------|
| XhoI-ScaI –Spo11 for | CTCGAGAGTACTAATCACAGCAGGGAACGTGGA   |
| EcoRI-Spo11 rev      | GAATTCGCTACTACTAGCTATGTTGC          |
| BglII-Spo11 for      | AGATCTATGAAGTGTCTCACTAGCAA          |
| ScaI-NotI-Spo11 rev  | GCGGCCCGCAGTACTCACAGGTACATTAACAGGGC |
| CMfor                | TGTTACCCTTGTTACACCG                 |
| CMrev                | CCACTCATCGCAGTACTGTT                |
| Crefor               | AATGCTTCTGTCCGTTTGCCGG              |
| Crerev               | CCAGGCTAAGTGCCTTCTCTAC              |
| C133 (Nbs1)          | GCGTAAA TGGTTGATTGTCC               |
| W123 (Nbs1)          | GATTG TCAGCACAGAAATCTTCCC           |
| Mut2(Nbs1)           | GCGCTCCCCTACCCGGTAGATT              |
| Jam-C F1             | GCTAGCCTGGTCTATTTAGCCT              |
| Jam-C R1             | CCAGTTCAGGCGATCTGA                  |
| Jam-C R4             | CCGGACCTGGAGTCGTG                   |
| Spo11-2-F            | GTTGGCCATGGTGAAGAGAG                |
| Spo11-lex-R          | TTTTGGTGAATCGCTTCTGA                |
| $\beta$ -actin for   | GGTCCGATGCCCTGAGGCTC                |
| $\beta$ -actin rev   | AAGGGTGTAACACGCAGCTC                |
| LoxP-F               | CGTATAATGTATGCTATACGAAG             |
| LoxP-R               | TTCCCACTGTATCCTGAGTG                |
| NB5F                 | CCAGAGGTCATGAGTTCAAATC              |
| 148-r                | CTACCCAGGTGAGTACTGAA                |
